# Supplementary material for: Efficient Expression of Maltohexaose-Forming α-Amylase from Bacillus stearothermophilus in Brevibacillus choshinensis SP3 and Its Use in Maltose Production
Source: PubMed Central journal article supplement (PMC5700550; doi:10.1155/2017/5479762), 2017-11-09
Supplement: 5479762.f1.pdf [file 5479762.f1.pdf]

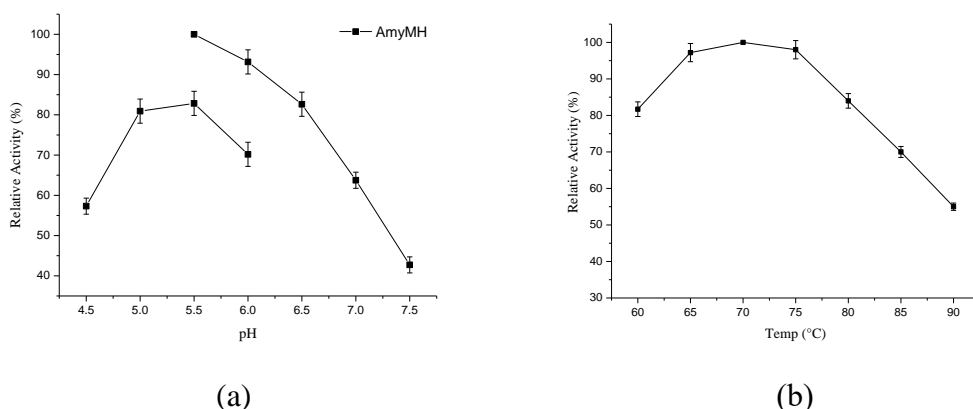

Fig. S1 The effects of pH (a) and temperature (b) on AmyMH activity

The pH optimum of the recombinant enzyme was determined by measuring its activity across a pH range of 4.5 to 7.5, in 0.5 pH-unit increments, using citrate buffer (pH 4.5 to 6.0) and phosphate buffer (pH 6.0 to 7.5). The temperature dependence of recombinant enzyme activity was measured between 60 and 95 °C. At each temperature, the buffer and substrate were pre-incubated for 10 min before initiating the assay with enzyme. Each reaction was allowed to proceed for 5 min.

Table S1 Kinetic parameters and specific activities of AmyMH

| Enzyme | $K_m$<br>(g/L) | $k_{cat}$<br>( $\times 10^2 \text{ min}^{-1}$ ) | $k_{cat}/K_m$<br>( $\times 10^2 \text{ g}\cdot\text{L}^{-1}\cdot\text{min}^{-1}$ ) | Specific activity<br>( $\times 10^4 \text{ U}\cdot\text{mg}^{-1}$ ) |
|--------|----------------|-------------------------------------------------|------------------------------------------------------------------------------------|---------------------------------------------------------------------|
| AmyMH  | $3.7 \pm 0.2$  | $14.0 \pm 0.3$                                  | $3.8 \pm 0.2$                                                                      | $5.8 \pm 0.2$                                                       |

The kinetic parameters ( $K_m$ ,  $V_{max}$ ,  $k_{cat}$  and  $k_{cat}/K_m$ ) of AmyMH were determined in 50 mM sodium phosphate buffer (pH 6.0) at 70 °C. Assays performed with purified enzyme contained soluble starch at concentrations ranging from 1 to 20  $\text{g}\cdot\text{L}^{-1}$ .  $V_{max}$  and  $K_m$  values were estimated by fitting the initial rate data to the Michaelis-Menten equation using nonlinear regression with GraphPad Prism software (GraphPad Software Inc., San Diego, CA).
